# Supplementary material for: Tetrahexahedral Au nanocrystals/aptamer based ultrasensitive electrochemical biosensor
Source: Royal Society of Chemistry journal article supplement (doi:10.1039/c3ra41065j), 2013-01-01
Supplement: c3ra41065j.pdf [file c3ra41065j.pdf]

## Supporting information

### Tetrahexahedral Au nanocrystals/aptamer based ultrasensitive electrochemical biosensor

Zhengbo Chen,<sup>\*a</sup> Junxia Guo,<sup>b</sup> Jing Li<sup>c</sup> and Lin Guo<sup>\*c</sup>

<sup>a</sup> Department of Chemistry, Capital Normal University, Beijing, 100048, China

<sup>b</sup> Railway Police College, Zhengzhou, 450053, China

<sup>c</sup> School of Chemistry & Environment, Beihang University, Beijing, 100191, China

\* Corresponding author. Tel.: 010-68903047

E-mail: czb979216@sina.com, guolin@buaa.edu.cn

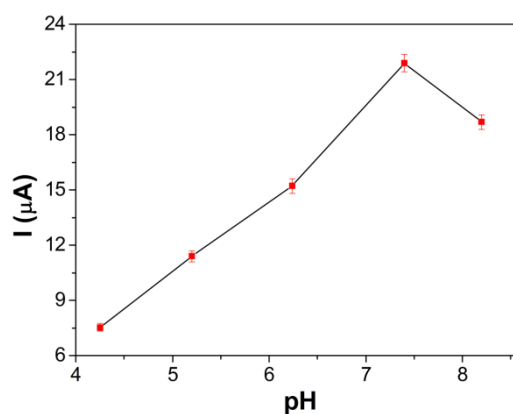

Fig. S1 The peak current in the SWV as a function of lysozyme concentration at 0.1 pM.

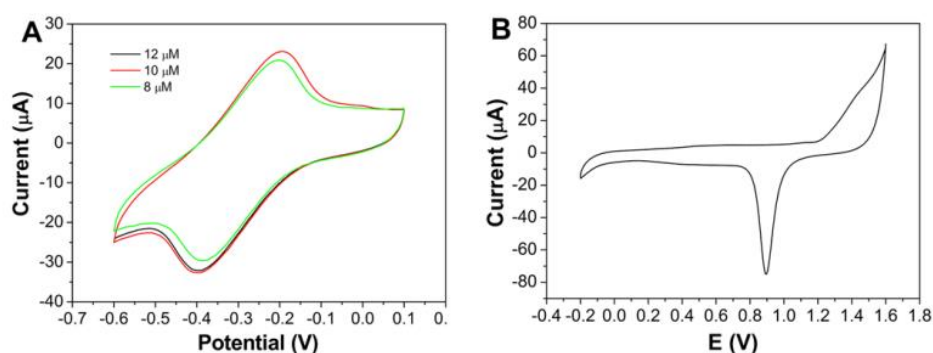

**Fig. S2** (A) CVs obtained from DNA duplex THH Au NCs /GCE in 10 mM Tris buffer (pH 7.41) in the presence of  $[\text{Ru}(\text{NH}_3)_6]^{3+}$  at different concentrations, the scan rate was 500 mV/s. (B) CVs of THH Au NCs /GCE in 0.5 M  $\text{H}_2\text{SO}_4$ , scan rate was 50 mV/s.
